# Supplementary material for: RNA-seq studies using wheat PHYTOCHROME B and PHYTOCHROME C mutants reveal shared and specific functions in the regulation of flowering and shade-avoidance pathways
Source: PubMed Central journal article supplement (PMC4915087; doi:10.1186/s12870-016-0831-3), 2016-06-21

**RNA-seq studies using wheat *PHYTOCHROME B* and *PHYTOCHROME C* mutants reveal shared and specific functions in the regulation of flowering and shade-avoidance pathways**

**Additional file 1**

Tables and figures in this additional file:

**Table S1:** Summary of RNA-seq reads and mapping.

**Table S2:** TopGO analysis for functional enrichment for genes regulated by *PHYB*, *PHYC* and in concert by both *PHYB* and *PHYC*.

**Figure S1:** Spike and floral organ phenotype of the *phyB*-null mutant. (a) Whole spike, (b) Single spikelet (c) Separated spikelet and (d) Stamen and stigma. (e) Comparison of internode length between 83-day-old *phyB*-null, *phyC*-null and wild-type Kronos plants. Leaves have been removed to facilitate visualization of internodes. Nodes are indicated by purple arrows. Bar = 10 cm.

**Figure S2:** Vegetative phenotype of wild-type control, *phyB*-null and *phyC*-null plants. (a) Leaf emergence rate, (b) Leaf length and (c) leaf width at three different timepoints (\*  $P < 0.05$ ; \*\*  $P < 0.01$ ).

**Figure S3:** Phenotype of four-week old *PHYB* wild-type, *phyB*-null, *PHYC* wild-type and *phyC*-null plants at the stage of harvest for RNA-seq analysis.

**Figure S4:** PCA plots of normalized expression values of all genes. (a) All libraries, (b) *PHYB* libraries and (c) *PHYC* libraries.

**Figure S5:** Relative transcript levels of six flowering time genes determined by qRT-PCR in wild-type and *phyB*-null mutants at three stages of development (Leaves from two-week, four-week and six-week-old plants). Expression levels are presented as fold-*ACTIN*.

\*  $P < 0.05$ , \*\*  $P < 0.01$ , \*\*\*  $P < 0.001$ .

**Table S1:** Summary of RNA-seq reads and mapping rates.

| Genotype              | Experimental replicate | Biological replicate | Raw reads         | Trimmed reads     | % mapped to gene loci | % uniquely mapped to gene loci |
|-----------------------|------------------------|----------------------|-------------------|-------------------|-----------------------|--------------------------------|
| <i>PHYB</i> wild-type | 1                      | 1                    | 42,783,726        | 38,193,836        | 95.6                  | 58.0                           |
|                       |                        | 2                    | 42,254,752        | 37,228,077        | 95.4                  | 58.1                           |
|                       |                        | 3                    | 58,349,947        | 50,793,083        | 95.6                  | 58.1                           |
|                       |                        | 4                    | 50,148,260        | 44,301,543        | 95.9                  | 56.5                           |
|                       | 2                      | 1                    | 57,790,105        | 53,475,278        | 95.5                  | 58.4                           |
|                       |                        | 2                    | 58,798,668        | 54,275,607        | 95.0                  | 58.6                           |
|                       |                        | 3                    | 61,694,504        | 57,095,077        | 95.6                  | 58.7                           |
|                       |                        | 4                    | 64,329,742        | 59,581,947        | 95.0                  | 58.8                           |
| <i>phyB</i> -null     | 1                      | 1                    | 48,416,815        | 43,374,525        | 94.8                  | 58.5                           |
|                       |                        | 2                    | 56,768,866        | 47,201,620        | 94.7                  | 58.0                           |
|                       |                        | 3                    | 88,913,796        | 81,109,422        | 94.9                  | 57.6                           |
|                       |                        | 4                    | 53,140,168        | 47,250,183        | 93.9                  | 58.5                           |
|                       | 2                      | 1                    | 51,385,316        | 47,550,092        | 95.0                  | 59.1                           |
|                       |                        | 2                    | 54,947,620        | 50,880,434        | 94.7                  | 59.2                           |
|                       |                        | 3                    | 60,875,008        | 56,371,576        | 94.6                  | 59.0                           |
|                       |                        | 4                    | 55,147,736        | 51,113,770        | 94.7                  | 59.1                           |
| <i>PHYC</i> wild-type | 1                      | 1                    | 41,280,436        | 40,263,724        | 95.7                  | 59.6                           |
|                       |                        | 2                    | 41,700,104        | 40,409,065        | 95.8                  | 62.3                           |
|                       |                        | 3                    | 43,295,783        | 42,605,342        | 95.6                  | 59.8                           |
|                       |                        | 4                    | 40,970,343        | 39,796,668        | 95.7                  | 60.5                           |
|                       | 2                      | 1                    | 38,880,169        | 37,994,979        | 95.4                  | 60.3                           |
|                       |                        | 2                    | 44,203,882        | 43,262,009        | 95.5                  | 59.6                           |
|                       |                        | 3                    | 42,528,948        | 41,619,486        | 95.4                  | 59.7                           |
|                       |                        | 4                    | 32,593,169        | 31,887,538        | 95.4                  | 59.8                           |
| <i>phyC</i> -null     | 1                      | 1                    | 45,693,558        | 44,904,496        | 95.1                  | 58.6                           |
|                       |                        | 2                    | 47,618,087        | 46,776,974        | 95.2                  | 59.3                           |
|                       |                        | 3                    | 44,675,515        | 43,960,996        | 95.4                  | 59.5                           |
|                       |                        | 4                    | 43,530,452        | 42,873,364        | 95.4                  | 59.2                           |
|                       | 2                      | 1                    | 36,142,687        | 35,291,647        | 95.2                  | 59.7                           |
|                       |                        | 2                    | 37,545,579        | 36,712,107        | 95.4                  | 58.9                           |
|                       |                        | 3                    | 46,594,218        | 45,656,274        | 95.1                  | 59.7                           |
|                       |                        | 4                    | 39,781,242        | 38,922,327        | 96.7                  | 41.0                           |
| <b>Average</b>        |                        |                      | <b>49,149,350</b> | <b>46,022,908</b> | <b>95.3</b>           | <b>58.5</b>                    |

**Table S2:** TopGO analysis for functional enrichment for genes regulated by *PHYB*, *PHYC* and in concert by both *PHYB* and *PHYC*.

|                                       | Accession  | Ontology                                                       | Annotated | Significant | Expected | <i>P</i> |
|---------------------------------------|------------|----------------------------------------------------------------|-----------|-------------|----------|----------|
| <b><i>PHYB</i>-regulated</b>          | GO:0009755 | Hormone-mediated signaling pathway                             | 1913      | 85          | 45.04    | 2.20E-08 |
|                                       | GO:0032870 | Cellular response to hormone stimulus                          | 1928      | 85          | 45.39    | 3.10E-08 |
|                                       | GO:0071495 | Cellular response to endogenous stimulus                       | 1930      | 85          | 45.44    | 3.30E-08 |
|                                       | GO:0009725 | Response to hormone stimulus                                   | 2598      | 103         | 61.17    | 2.10E-07 |
|                                       | GO:0009719 | Response to endogenous stimulus                                | 2672      | 104         | 62.91    | 4.20E-07 |
|                                       | GO:0043269 | Regulation of ion transport                                    | 185       | 18          | 4.36     | 4.60E-07 |
|                                       | GO:0009642 | Response to light intensity                                    | 337       | 24          | 7.93     | 2.00E-06 |
|                                       | GO:0051049 | Regulation of transport                                        | 208       | 18          | 4.9      | 2.50E-06 |
|                                       | GO:0006468 | Protein phosphorylation                                        | 4258      | 146         | 100.25   | 2.90E-06 |
|                                       | GO:0071310 | Cellular response to organic substance                         | 2428      | 93          | 57.16    | 3.40E-06 |
| <b><i>PHYC</i>-regulated</b>          | GO:0048586 | Regulation of long-day photoperiodism, flowering               | 12        | 2           | 0.03     | 0.00036  |
|                                       | GO:2000028 | Regulation of photoperiodism, flowering                        | 12        | 2           | 0.03     | 0.00036  |
|                                       | GO:0048574 | Long-day photoperiodism, flowering                             | 30        | 2           | 0.07     | 0.00233  |
|                                       | GO:0048571 | Long-day photoperiodism                                        | 38        | 2           | 0.09     | 0.00372  |
|                                       | GO:0015693 | Magnesium ion transport                                        | 44        | 2           | 0.1      | 0.00496  |
|                                       | GO:0006355 | Regulation of transcription, DNA-dependent                     | 3561      | 16          | 8.46     | 0.01022  |
|                                       | GO:2001141 | Regulation of RNA biosynthetic process                         | 3561      | 16          | 8.46     | 0.01022  |
|                                       | GO:0051252 | Regulation of RNA metabolic process                            | 3587      | 16          | 8.53     | 0.0109   |
|                                       | GO:0048552 | Regulation of metalloenzyme activity                           | 6         | 1           | 0.01     | 0.01418  |
|                                       | GO:0048554 | Positive regulation of metalloenzyme activity                  | 6         | 1           | 0.01     | 0.01418  |
| <b><i>PHYB-PHYC</i><br/>regulated</b> | GO:0006355 | Regulation of transcription, DNA-dependent                     | 3561      | 10          | 2.19     | 3.30E-05 |
|                                       | GO:2001141 | Regulation of RNA biosynthetic process                         | 3561      | 10          | 2.19     | 3.30E-05 |
|                                       | GO:0051252 | Regulation of RNA metabolic process                            | 3587      | 10          | 2.2      | 3.50E-05 |
|                                       | GO:0010556 | Regulation of macromolecule biosynthetic process               | 3910      | 10          | 2.4      | 7.20E-05 |
|                                       | GO:2000112 | Regulation of cellular macromolecule biosynthetic process      | 3910      | 10          | 2.4      | 7.20E-05 |
|                                       | GO:0019219 | Regulation of nucleobase-containing compound metabolic process | 3926      | 10          | 2.41     | 7.50E-05 |
|                                       | GO:0031326 | Regulation of cellular biosynthetic process                    | 3950      | 10          | 2.43     | 7.90E-05 |
|                                       | GO:0051171 | Regulation of nitrogen compound metabolic process              | 3955      | 10          | 2.43     | 8.00E-05 |
|                                       | GO:0009889 | Regulation of biosynthetic process                             | 4011      | 10          | 2.47     | 9.00E-05 |
|                                       | GO:0006351 | Transcription, DNA-dependent                                   | 4194      | 10          | 2.58     | 0.00013  |

**Figure S1:** Spike and floral organ phenotype of the *phyB*-null mutant. (a) Whole spike, (b) Single spikelet (c) Separated spikelet and (d) Stamen and stigma. (e) Comparison of internode length between 83-day-old *phyB*-null, *phyC*-null and wild-type Kronos plants. Leaves have been removed to facilitate visualization of internodes. Nodes are indicated by purple arrows. Bar = 10 cm.

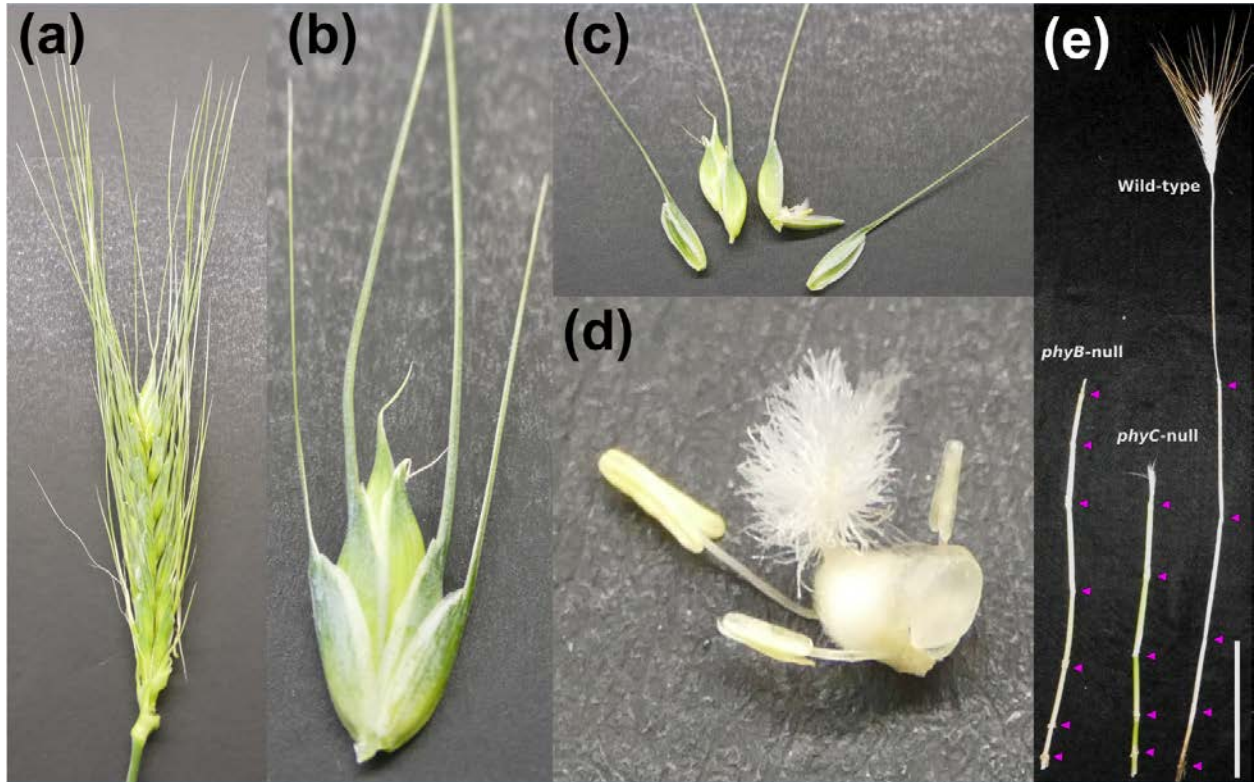

**Figure S2:** Vegetative phenotype of wild-type control, *phyB*-null and *phyC*-null plants. (a) Leaf emergence rate, (b) Leaf length and (c) leaf width at three different timepoints.

(\*  $P < 0.05$ ; \*\*  $P < 0.01$ ).

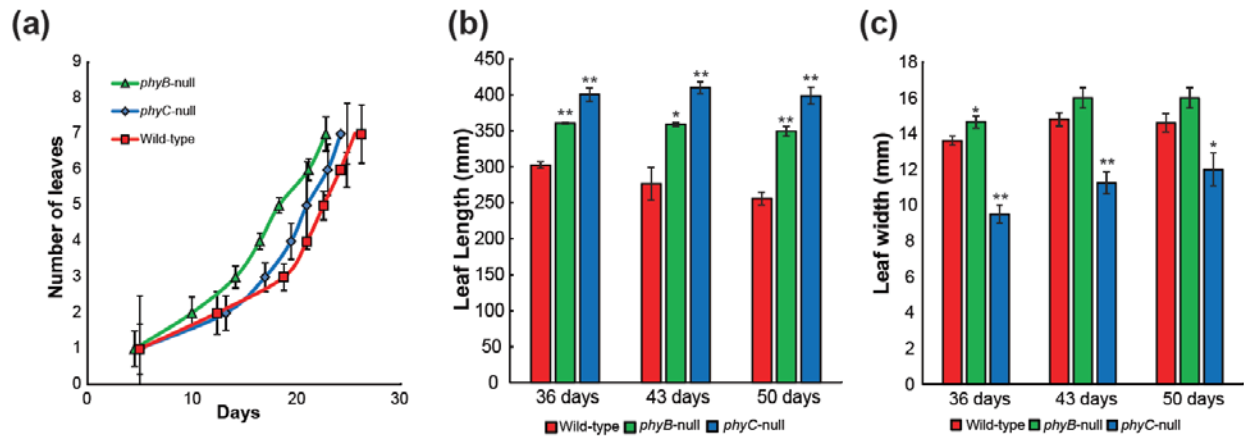

**Figure S3:** Phenotype of four-week old *PHYB* wild-type, *phyB*-null, *PHYC* wild-type and *phyC*-null plants at the stage of harvest for RNA-seq analysis.

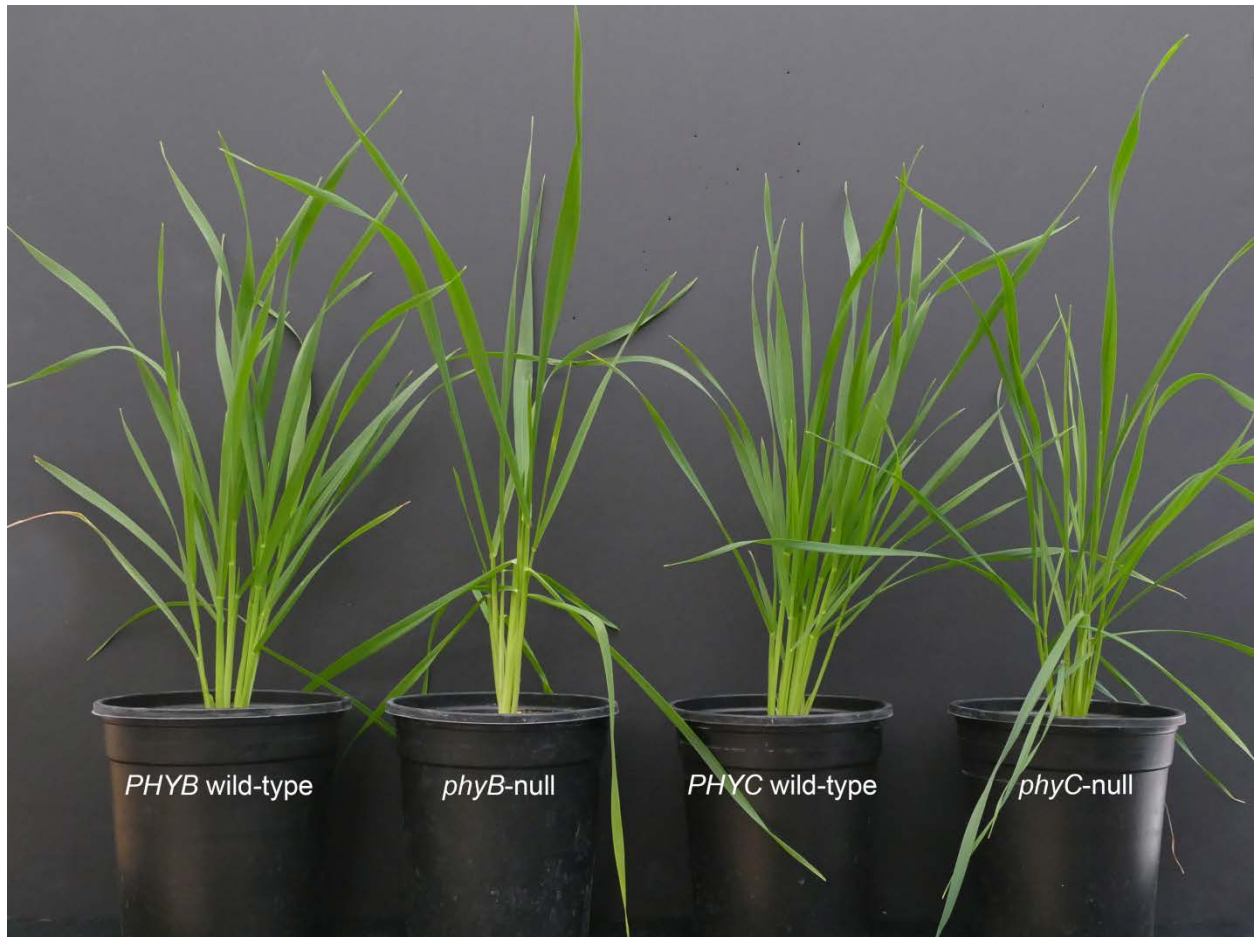

**Figure S4:** PCA plots of normalized expression values of all genes. (a) All libraries, (b) PHYB libraries and (c) PHYC libraries.

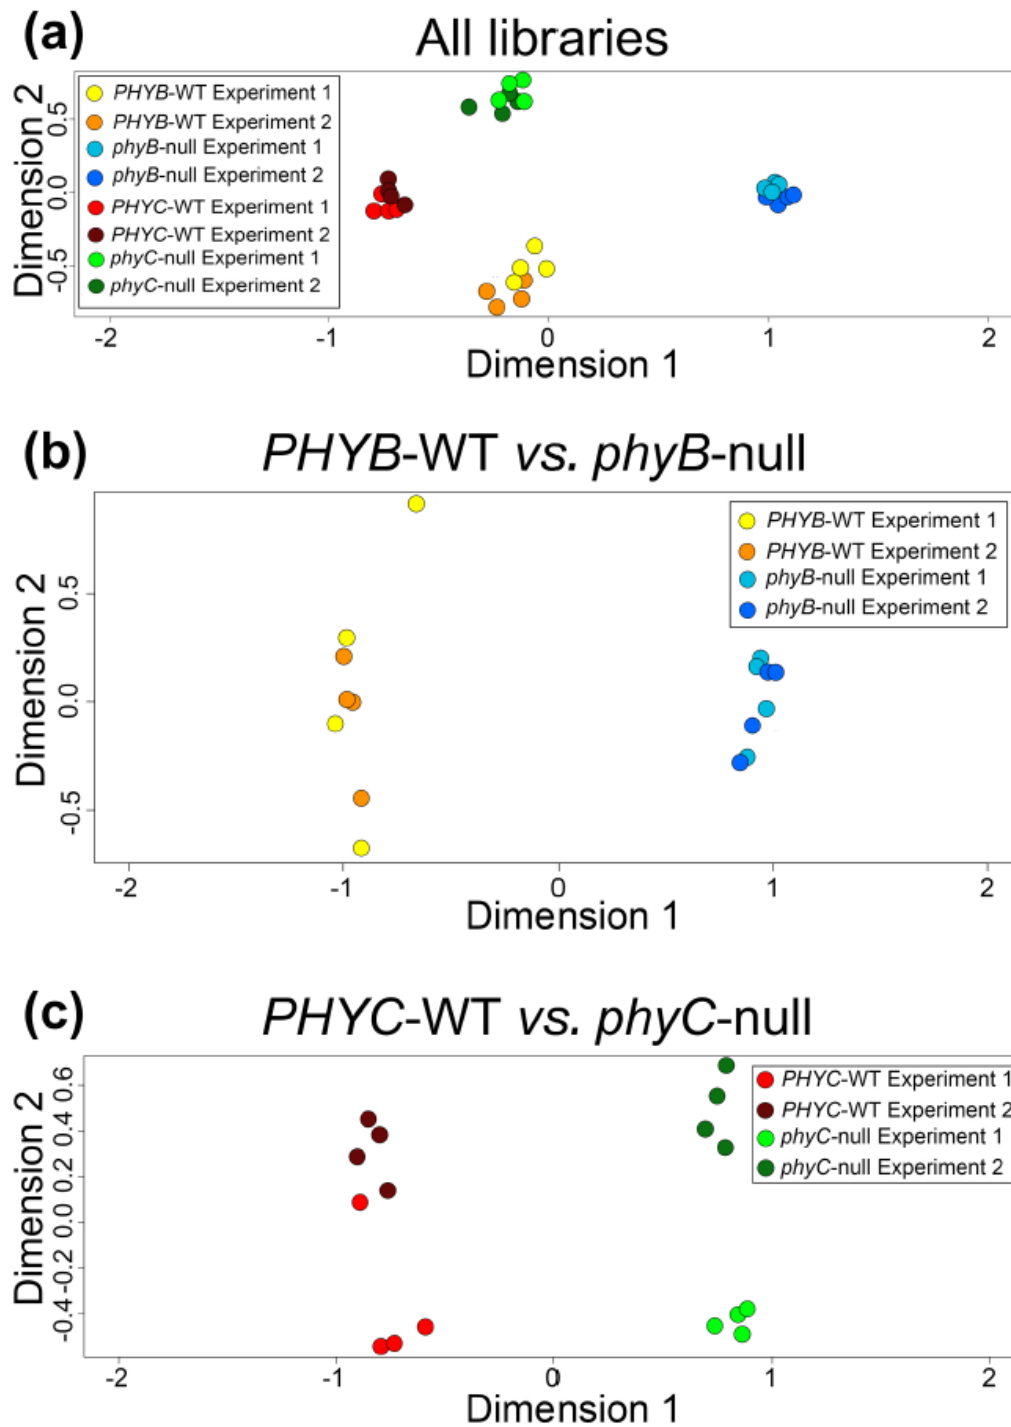

**Figure S5:** Relative transcript levels of six flowering time genes determined by qRT-PCR in wild-type and *phyB*-null mutants at three stages of development (Leaves from two-week, four-week and six-week-old plants). Expression levels are presented as fold-*ACTIN*.

\*  $P < 0.05$ , \*\*  $P < 0.01$ , \*\*\*  $P < 0.001$ .

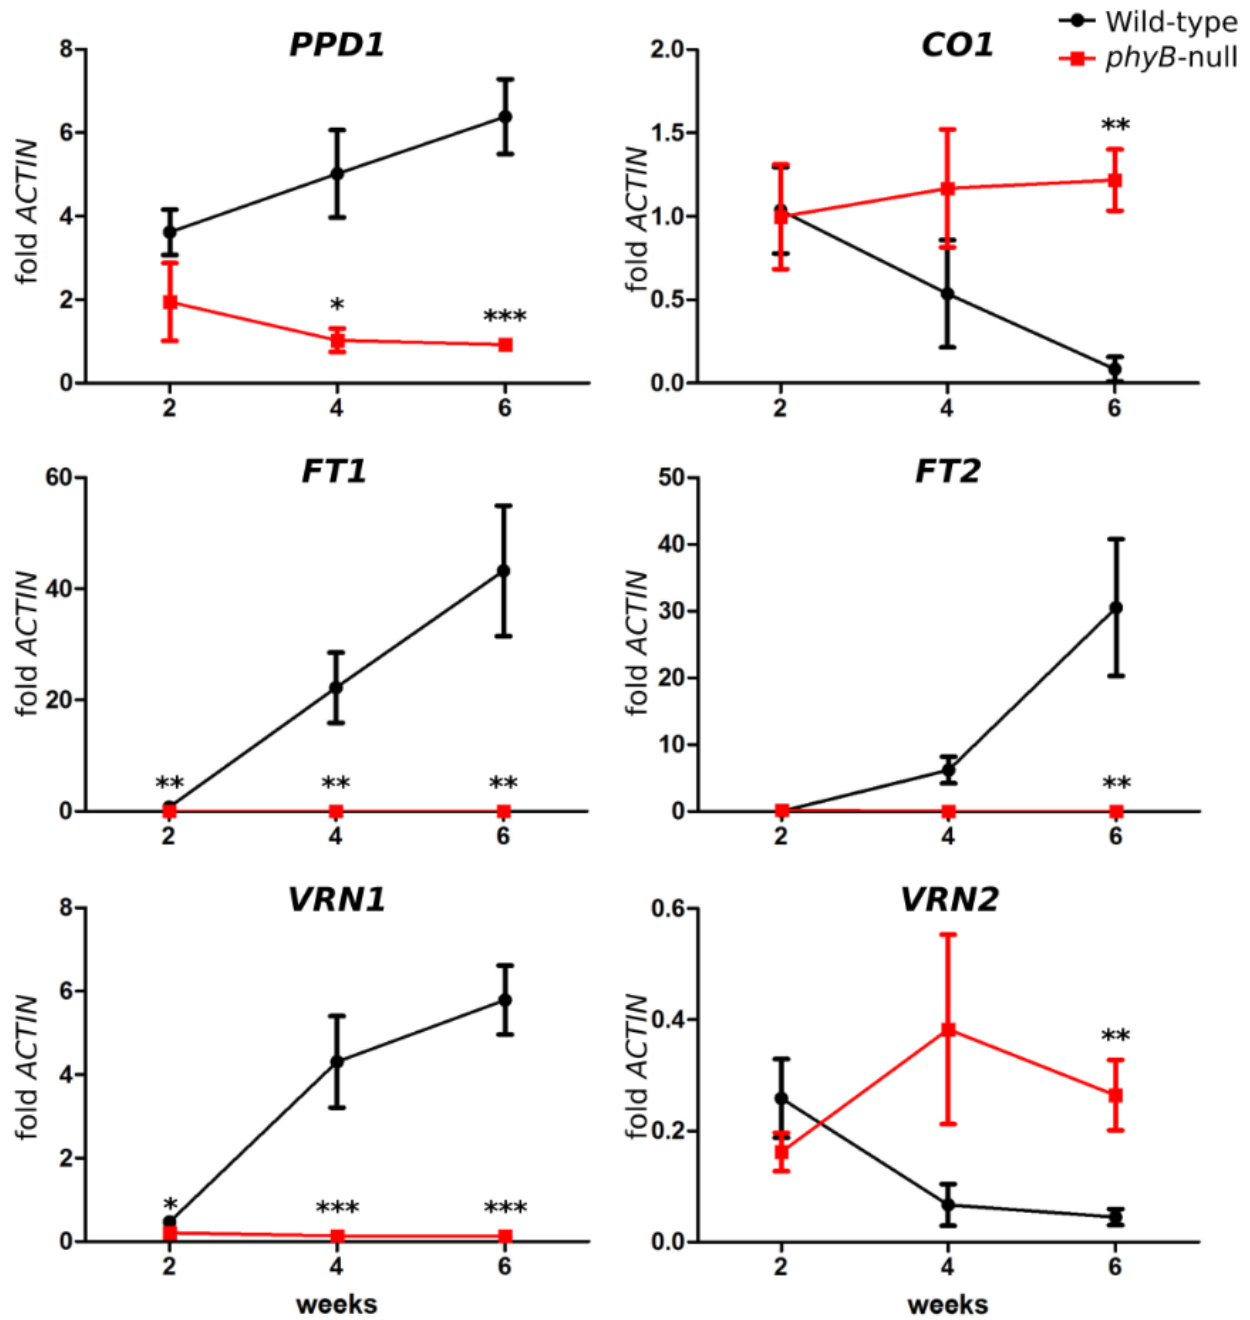

Supplement: 12870_2016_831_MOESM1_ESM.pdf [file 12870_2016_831_MOESM1_ESM.pdf]
